# Supplementary material
Source: PubMed Central journal article supplement (PMC6931179)
Supplement: 36004_Appendix.pdf [file 36004_Appendix.pdf]

**Section 1**

The next section is about your sport participation and information about you.

- 1. These first questions are about organized, competitive sports that you play, either in school or as part of a club team.**

**In the last 12 months, which of the following organized, competitive sports have you played? Please check all that apply.**

- |                                         |                                     |                                             |                                     |
|-----------------------------------------|-------------------------------------|---------------------------------------------|-------------------------------------|
| <input type="checkbox"/> Baseball       | <input type="checkbox"/> Football   | <input type="checkbox"/> Soccer             | <input type="checkbox"/> Track      |
| <input type="checkbox"/> Basketball     | <input type="checkbox"/> Gymnastics | <input type="checkbox"/> Softball           | <input type="checkbox"/> Volleyball |
| <input type="checkbox"/> Cheer or Dance | <input type="checkbox"/> Ice Hockey | <input type="checkbox"/> Swimming or Diving | <input type="checkbox"/> Wrestling  |
| <input type="checkbox"/> Cross Country  | <input type="checkbox"/> Lacrosse   | <input type="checkbox"/> Tennis             |                                     |

- 2. Your primary sport is the organized, competitive sport that is most important to you.**

**Which of the following would you say is your primary sport? Please choose one.**

- |                                      |                                  |                                          |                                  |
|--------------------------------------|----------------------------------|------------------------------------------|----------------------------------|
| <input type="radio"/> Baseball       | <input type="radio"/> Football   | <input type="radio"/> Soccer             | <input type="radio"/> Track      |
| <input type="radio"/> Basketball     | <input type="radio"/> Gymnastics | <input type="radio"/> Softball           | <input type="radio"/> Volleyball |
| <input type="radio"/> Cheer or Dance | <input type="radio"/> Ice Hockey | <input type="radio"/> Swimming or Diving | <input type="radio"/> Wrestling  |
| <input type="radio"/> Cross Country  | <input type="radio"/> Lacrosse   | <input type="radio"/> Tennis             |                                  |

- 3. How old were you when you started playing organized, competitive sports?**

- |                       |                       |                       |                       |                       |                       |                       |                       |                       |                       |                       |                       |                       |                       |
|-----------------------|-----------------------|-----------------------|-----------------------|-----------------------|-----------------------|-----------------------|-----------------------|-----------------------|-----------------------|-----------------------|-----------------------|-----------------------|-----------------------|
| 5 or<br>less          | 6                     | 7                     | 8                     | 9                     | 10                    | 11                    | 12                    | 13                    | 14                    | 15                    | 16                    | 17                    | 18                    |
| <input type="radio"/> |

- 4. How old were you when you started playing your primary sport?**

- |                       |                       |                       |                       |                       |                       |                       |                       |                       |                       |                       |                       |                       |                       |
|-----------------------|-----------------------|-----------------------|-----------------------|-----------------------|-----------------------|-----------------------|-----------------------|-----------------------|-----------------------|-----------------------|-----------------------|-----------------------|-----------------------|
| 5 or<br>less          | 6                     | 7                     | 8                     | 9                     | 10                    | 11                    | 12                    | 13                    | 14                    | 15                    | 16                    | 17                    | 18                    |
| <input type="radio"/> |

- 5. In the last 12 months, in which of the following months did you play your primary sport? Please check all that apply**

- |                                   |                                |                                    |                                   |
|-----------------------------------|--------------------------------|------------------------------------|-----------------------------------|
| <input type="checkbox"/> January  | <input type="checkbox"/> April | <input type="checkbox"/> July      | <input type="checkbox"/> October  |
| <input type="checkbox"/> February | <input type="checkbox"/> May   | <input type="checkbox"/> August    | <input type="checkbox"/> November |
| <input type="checkbox"/> March    | <input type="checkbox"/> June  | <input type="checkbox"/> September | <input type="checkbox"/> December |

- 6. In the last 12 months, in which following months did you play any organized, competitive sports, including your primary sport? Please check all that apply.**

- |                                   |                                |                                    |                                   |
|-----------------------------------|--------------------------------|------------------------------------|-----------------------------------|
| <input type="checkbox"/> January  | <input type="checkbox"/> April | <input type="checkbox"/> July      | <input type="checkbox"/> October  |
| <input type="checkbox"/> February | <input type="checkbox"/> May   | <input type="checkbox"/> August    | <input type="checkbox"/> November |
| <input type="checkbox"/> March    | <input type="checkbox"/> June  | <input type="checkbox"/> September | <input type="checkbox"/> December |

**7. The next questions are about the amount of time you spend participating – both practicing and playing – in organized, competitive sports.**

**During the season for your primary sport, about how many days a week do you participate in your primary sport?**

- 1                      2                      3                      4                      5                      6                      7

**8. During the season for your primary sport, about how many hours each day do you participate in your primary sport?**

- 1      2      3      4      5      6      7      8      9      10      11      12

**9. For the next questions think about all of the organized, competitive sports you play, including your primary sport.**

**In the last 12 months, about how many days a week did you play any organized, competitive sports, including your primary sport?**

- 1                      2                      3                      4                      5                      6                      7

**10. In the last 12 months, about how many hours each day did you play in any organized, competitive sports, including your primary sport?**

- 1      2      3      4      5      6      7      8      9      10      11      12

**11. Unorganized sports activities include things like playing sports with friends outside of school or playing sports in gym class.**

**In the last 12 months, about how many hours each week did you participate in unorganized sports?**

- |                               |                                |                                |                                        |
|-------------------------------|--------------------------------|--------------------------------|----------------------------------------|
| <input type="radio"/> 0 hours | <input type="radio"/> 6 hours  | <input type="radio"/> 12 hours | <input type="radio"/> 18 hours         |
| <input type="radio"/> 1 hour  | <input type="radio"/> 7 hours  | <input type="radio"/> 13 hours | <input type="radio"/> 19 or more hours |
| <input type="radio"/> 2 hours | <input type="radio"/> 8 hours  | <input type="radio"/> 14 hours |                                        |
| <input type="radio"/> 3 hours | <input type="radio"/> 9 hours  | <input type="radio"/> 15 hours |                                        |
| <input type="radio"/> 4 hours | <input type="radio"/> 10 hours | <input type="radio"/> 16 hours |                                        |
| <input type="radio"/> 5 hours | <input type="radio"/> 11 hours | <input type="radio"/> 17 hours |                                        |

**12. These next questions are just about your primary sport.**

**Do you play your primary sport in an organized league outside of school?**

- Yes  
 No

**13. Thinking about all of the time that you spent practicing in organized, competitive sports about how much time did you spend practicing in your primary sport?**

- Less than 75% of the time
- 75% or more of the time

**14. In the last 12 months, did you ever miss time with friends because you were practicing to improve your skill in your primary sport?**

- Yes
- No

**15. Have you quit other sports to focus on one sport?**

- Yes
- No

**16. Do you consider your primary sport more important than the other sports?**

- Yes
- No

**17. Do you regularly travel out of state for your primary sport?**

- Yes
- No

**18. Do you train more than eight months a year in your primary sport?**

- Yes
- No

**19. Are you male or female?**

- Male
- Female

**20. How old are you?**

Age

**21. What grade are you currently in?**

- |                       |                       |                       |                       |                       |                       |                       |                       |                       |
|-----------------------|-----------------------|-----------------------|-----------------------|-----------------------|-----------------------|-----------------------|-----------------------|-----------------------|
| 4 <sup>th</sup>       | 5 <sup>th</sup>       | 6 <sup>th</sup>       | 7 <sup>th</sup>       | 8 <sup>th</sup>       | 9 <sup>th</sup>       | 10 <sup>th</sup>      | 11 <sup>th</sup>      | 12 <sup>th</sup>      |
| <input type="radio"/> |

**Section 2**

The next section is about any sports related injuries you may have had in the last 12 months.

| In the last 12 months, have you ever injured your: | What kind of injury was it? | How did this injury happen? | Did you see a doctor because of this injury? | How many days of your sport did you miss? | What sport were you playing when this injury happened? | In what month did you have this injury? | Have you fully recovered from this injury? |
|----------------------------------------------------|-----------------------------|-----------------------------|----------------------------------------------|-------------------------------------------|--------------------------------------------------------|-----------------------------------------|--------------------------------------------|
|----------------------------------------------------|-----------------------------|-----------------------------|----------------------------------------------|-------------------------------------------|--------------------------------------------------------|-----------------------------------------|--------------------------------------------|

**1. Head?**

|                                                       |                                                                                                                                                             |                                                                                                                                                                                                                                                      |                                                       |                         |                        |                |                                                       |
|-------------------------------------------------------|-------------------------------------------------------------------------------------------------------------------------------------------------------------|------------------------------------------------------------------------------------------------------------------------------------------------------------------------------------------------------------------------------------------------------|-------------------------------------------------------|-------------------------|------------------------|----------------|-------------------------------------------------------|
| <input type="radio"/> Yes<br><input type="radio"/> No | <input type="radio"/> Concussion<br><input type="radio"/> Fracture<br><input type="radio"/> Bruise<br><input type="radio"/> Other? Please tell us:<br>_____ | <input type="radio"/> Overuse from playing or practicing too much or too often<br><input type="radio"/> Direct contact with another player or object<br><input type="radio"/> Non-contact injury not caused by contact with another player or object | <input type="radio"/> Yes<br><input type="radio"/> No | _____<br>Number of days | _____<br>Name of Sport | _____<br>Month | <input type="radio"/> Yes<br><input type="radio"/> No |
|-------------------------------------------------------|-------------------------------------------------------------------------------------------------------------------------------------------------------------|------------------------------------------------------------------------------------------------------------------------------------------------------------------------------------------------------------------------------------------------------|-------------------------------------------------------|-------------------------|------------------------|----------------|-------------------------------------------------------|

**2. Neck?**

|                                                       |                                                                                                                                                                                                     |                                                                                                                                                                                                                                                      |                                                       |                         |                        |                |                                                       |
|-------------------------------------------------------|-----------------------------------------------------------------------------------------------------------------------------------------------------------------------------------------------------|------------------------------------------------------------------------------------------------------------------------------------------------------------------------------------------------------------------------------------------------------|-------------------------------------------------------|-------------------------|------------------------|----------------|-------------------------------------------------------|
| <input type="radio"/> Yes<br><input type="radio"/> No | <input type="radio"/> Muscle strain<br><input type="radio"/> Disc injury<br><input type="radio"/> Fracture<br><input type="radio"/> Bruise<br><input type="radio"/> Other? Please tell us:<br>_____ | <input type="radio"/> Overuse from playing or practicing too much or too often<br><input type="radio"/> Direct contact with another player or object<br><input type="radio"/> Non-contact injury not caused by contact with another player or object | <input type="radio"/> Yes<br><input type="radio"/> No | _____<br>Number of days | _____<br>Name of Sport | _____<br>Month | <input type="radio"/> Yes<br><input type="radio"/> No |
|-------------------------------------------------------|-----------------------------------------------------------------------------------------------------------------------------------------------------------------------------------------------------|------------------------------------------------------------------------------------------------------------------------------------------------------------------------------------------------------------------------------------------------------|-------------------------------------------------------|-------------------------|------------------------|----------------|-------------------------------------------------------|

**3. Back?**

|                                                       |                                                                                                                                                                                                     |                                                                                                                                                                                                                                                      |                                                       |                         |                        |                |                                                       |
|-------------------------------------------------------|-----------------------------------------------------------------------------------------------------------------------------------------------------------------------------------------------------|------------------------------------------------------------------------------------------------------------------------------------------------------------------------------------------------------------------------------------------------------|-------------------------------------------------------|-------------------------|------------------------|----------------|-------------------------------------------------------|
| <input type="radio"/> Yes<br><input type="radio"/> No | <input type="radio"/> Muscle strain<br><input type="radio"/> Disc injury<br><input type="radio"/> Fracture<br><input type="radio"/> Bruise<br><input type="radio"/> Other? Please tell us:<br>_____ | <input type="radio"/> Overuse from playing or practicing too much or too often<br><input type="radio"/> Direct contact with another player or object<br><input type="radio"/> Non-contact injury not caused by contact with another player or object | <input type="radio"/> Yes<br><input type="radio"/> No | _____<br>Number of days | _____<br>Name of Sport | _____<br>Month | <input type="radio"/> Yes<br><input type="radio"/> No |
|-------------------------------------------------------|-----------------------------------------------------------------------------------------------------------------------------------------------------------------------------------------------------|------------------------------------------------------------------------------------------------------------------------------------------------------------------------------------------------------------------------------------------------------|-------------------------------------------------------|-------------------------|------------------------|----------------|-------------------------------------------------------|

Next Page

| In the last 12 months, have you ever injured your: | What kind of injury was it? | How did this injury happen? | Did you see a doctor because of this injury? | How many days of your sport did you miss? | What sport were you playing when this injury happened? | In what month did you have this injury? | Have you fully recovered from this injury? |
|----------------------------------------------------|-----------------------------|-----------------------------|----------------------------------------------|-------------------------------------------|--------------------------------------------------------|-----------------------------------------|--------------------------------------------|
|----------------------------------------------------|-----------------------------|-----------------------------|----------------------------------------------|-------------------------------------------|--------------------------------------------------------|-----------------------------------------|--------------------------------------------|

| 4. Shoulder?                                          |                                                                                                                                                                                                                                 |                                                                                                                                                                                                                                                      |                                                       |                |               |       |                                                       |
|-------------------------------------------------------|---------------------------------------------------------------------------------------------------------------------------------------------------------------------------------------------------------------------------------|------------------------------------------------------------------------------------------------------------------------------------------------------------------------------------------------------------------------------------------------------|-------------------------------------------------------|----------------|---------------|-------|-------------------------------------------------------|
| <input type="radio"/> Yes<br><input type="radio"/> No | <input type="radio"/> Muscle strain<br><input type="radio"/> Joint sprain<br><input type="radio"/> Tendonitis<br><input type="radio"/> Fracture<br><input type="radio"/> Bruise<br><input type="radio"/> Other: Please tell us: | <input type="radio"/> Overuse from playing or practicing too much or too often<br><input type="radio"/> Direct contact with another player or object<br><input type="radio"/> Non-contact injury not caused by contact with another player or object | <input type="radio"/> Yes<br><input type="radio"/> No | _____          | _____         | _____ | <input type="radio"/> Yes<br><input type="radio"/> No |
|                                                       |                                                                                                                                                                                                                                 |                                                                                                                                                                                                                                                      |                                                       | Number of days | Name of Sport | Month |                                                       |

| 5. Elbow?                                             |                                                                                                                                                                                                                                 |                                                                                                                                                                                                                                                      |                                                       |                |               |       |                                                       |
|-------------------------------------------------------|---------------------------------------------------------------------------------------------------------------------------------------------------------------------------------------------------------------------------------|------------------------------------------------------------------------------------------------------------------------------------------------------------------------------------------------------------------------------------------------------|-------------------------------------------------------|----------------|---------------|-------|-------------------------------------------------------|
| <input type="radio"/> Yes<br><input type="radio"/> No | <input type="radio"/> Muscle strain<br><input type="radio"/> Joint sprain<br><input type="radio"/> Tendonitis<br><input type="radio"/> Fracture<br><input type="radio"/> Bruise<br><input type="radio"/> Other: Please tell us: | <input type="radio"/> Overuse from playing or practicing too much or too often<br><input type="radio"/> Direct contact with another player or object<br><input type="radio"/> Non-contact injury not caused by contact with another player or object | <input type="radio"/> Yes<br><input type="radio"/> No | _____          | _____         | _____ | <input type="radio"/> Yes<br><input type="radio"/> No |
|                                                       |                                                                                                                                                                                                                                 |                                                                                                                                                                                                                                                      |                                                       | Number of days | Name of Sport | Month |                                                       |

| 6. Wrist or Hand?                                     |                                                                                                                                                                                                                                 |                                                                                                                                                                                                                                                      |                                                       |                |               |       |                                                       |
|-------------------------------------------------------|---------------------------------------------------------------------------------------------------------------------------------------------------------------------------------------------------------------------------------|------------------------------------------------------------------------------------------------------------------------------------------------------------------------------------------------------------------------------------------------------|-------------------------------------------------------|----------------|---------------|-------|-------------------------------------------------------|
| <input type="radio"/> Yes<br><input type="radio"/> No | <input type="radio"/> Muscle strain<br><input type="radio"/> Joint sprain<br><input type="radio"/> Tendonitis<br><input type="radio"/> Fracture<br><input type="radio"/> Bruise<br><input type="radio"/> Other: Please tell us: | <input type="radio"/> Overuse from playing or practicing too much or too often<br><input type="radio"/> Direct contact with another player or object<br><input type="radio"/> Non-contact injury not caused by contact with another player or object | <input type="radio"/> Yes<br><input type="radio"/> No | _____          | _____         | _____ | <input type="radio"/> Yes<br><input type="radio"/> No |
|                                                       |                                                                                                                                                                                                                                 |                                                                                                                                                                                                                                                      |                                                       | Number of days | Name of Sport | Month |                                                       |

Next Page

| In the last 12 months, have you ever injured your: | What kind of injury was it? | How did this injury happen? | Did you see a doctor because of this injury? | How many days of your sport did you miss? | What sport were you playing when this injury happened? | In what month did you have this injury? | Have you fully recovered from this injury? |
|----------------------------------------------------|-----------------------------|-----------------------------|----------------------------------------------|-------------------------------------------|--------------------------------------------------------|-----------------------------------------|--------------------------------------------|
|----------------------------------------------------|-----------------------------|-----------------------------|----------------------------------------------|-------------------------------------------|--------------------------------------------------------|-----------------------------------------|--------------------------------------------|

**7. Hip?**

|                                                       |                                                                                                                                                                                                                                 |                                                                                                                                                                                                                                                      |                                                       |                         |                        |                |                                                       |
|-------------------------------------------------------|---------------------------------------------------------------------------------------------------------------------------------------------------------------------------------------------------------------------------------|------------------------------------------------------------------------------------------------------------------------------------------------------------------------------------------------------------------------------------------------------|-------------------------------------------------------|-------------------------|------------------------|----------------|-------------------------------------------------------|
| <input type="radio"/> Yes<br><input type="radio"/> No | <input type="radio"/> Muscle strain<br><input type="radio"/> Joint sprain<br><input type="radio"/> Tendonitis<br><input type="radio"/> Fracture<br><input type="radio"/> Bruise<br><input type="radio"/> Other: Please tell us: | <input type="radio"/> Overuse from playing or practicing too much or too often<br><input type="radio"/> Direct contact with another player or object<br><input type="radio"/> Non-contact injury not caused by contact with another player or object | <input type="radio"/> Yes<br><input type="radio"/> No | _____<br>Number of days | _____<br>Name of Sport | _____<br>Month | <input type="radio"/> Yes<br><input type="radio"/> No |
|                                                       |                                                                                                                                                                                                                                 |                                                                                                                                                                                                                                                      |                                                       |                         |                        |                |                                                       |

**8. Upper Leg?**

|                                                       |                                                                                                                                                                                                                                 |                                                                                                                                                                                                                                                      |                                                       |                         |                        |                |                                                       |
|-------------------------------------------------------|---------------------------------------------------------------------------------------------------------------------------------------------------------------------------------------------------------------------------------|------------------------------------------------------------------------------------------------------------------------------------------------------------------------------------------------------------------------------------------------------|-------------------------------------------------------|-------------------------|------------------------|----------------|-------------------------------------------------------|
| <input type="radio"/> Yes<br><input type="radio"/> No | <input type="radio"/> Muscle strain<br><input type="radio"/> Joint sprain<br><input type="radio"/> Tendonitis<br><input type="radio"/> Fracture<br><input type="radio"/> Bruise<br><input type="radio"/> Other: Please tell us: | <input type="radio"/> Overuse from playing or practicing too much or too often<br><input type="radio"/> Direct contact with another player or object<br><input type="radio"/> Non-contact injury not caused by contact with another player or object | <input type="radio"/> Yes<br><input type="radio"/> No | _____<br>Number of days | _____<br>Name of Sport | _____<br>Month | <input type="radio"/> Yes<br><input type="radio"/> No |
|                                                       |                                                                                                                                                                                                                                 |                                                                                                                                                                                                                                                      |                                                       |                         |                        |                |                                                       |

**9. Knee?**

|                                                       |                                                                                                                                                                                                                                 |                                                                                                                                                                                                                                                      |                                                       |                         |                        |                |                                                       |
|-------------------------------------------------------|---------------------------------------------------------------------------------------------------------------------------------------------------------------------------------------------------------------------------------|------------------------------------------------------------------------------------------------------------------------------------------------------------------------------------------------------------------------------------------------------|-------------------------------------------------------|-------------------------|------------------------|----------------|-------------------------------------------------------|
| <input type="radio"/> Yes<br><input type="radio"/> No | <input type="radio"/> Muscle strain<br><input type="radio"/> Joint sprain<br><input type="radio"/> Tendonitis<br><input type="radio"/> Fracture<br><input type="radio"/> Bruise<br><input type="radio"/> Other: Please tell us: | <input type="radio"/> Overuse from playing or practicing too much or too often<br><input type="radio"/> Direct contact with another player or object<br><input type="radio"/> Non-contact injury not caused by contact with another player or object | <input type="radio"/> Yes<br><input type="radio"/> No | _____<br>Number of days | _____<br>Name of Sport | _____<br>Month | <input type="radio"/> Yes<br><input type="radio"/> No |
|                                                       |                                                                                                                                                                                                                                 |                                                                                                                                                                                                                                                      |                                                       |                         |                        |                |                                                       |

Next Page

| In the last 12 months, have you ever injured your: | What kind of injury was it? | How did this injury happen? | Did you see a doctor because of this injury? | How many days of your sport did you miss? | What sport were you playing when this injury happened? | In what month did you have this injury? | Have you fully recovered from this injury? |
|----------------------------------------------------|-----------------------------|-----------------------------|----------------------------------------------|-------------------------------------------|--------------------------------------------------------|-----------------------------------------|--------------------------------------------|
|----------------------------------------------------|-----------------------------|-----------------------------|----------------------------------------------|-------------------------------------------|--------------------------------------------------------|-----------------------------------------|--------------------------------------------|

**10. Lower Leg?**

|                                                       |                                                                                                                                                                                                                                 |                                                                                                                                                                                                                                                      |                                                       |                         |                        |                |                                                       |
|-------------------------------------------------------|---------------------------------------------------------------------------------------------------------------------------------------------------------------------------------------------------------------------------------|------------------------------------------------------------------------------------------------------------------------------------------------------------------------------------------------------------------------------------------------------|-------------------------------------------------------|-------------------------|------------------------|----------------|-------------------------------------------------------|
| <input type="radio"/> Yes<br><input type="radio"/> No | <input type="radio"/> Muscle strain<br><input type="radio"/> Joint sprain<br><input type="radio"/> Tendonitis<br><input type="radio"/> Fracture<br><input type="radio"/> Bruise<br><input type="radio"/> Other: Please tell us: | <input type="radio"/> Overuse from playing or practicing too much or too often<br><input type="radio"/> Direct contact with another player or object<br><input type="radio"/> Non-contact injury not caused by contact with another player or object | <input type="radio"/> Yes<br><input type="radio"/> No | _____<br>Number of days | _____<br>Name of Sport | _____<br>Month | <input type="radio"/> Yes<br><input type="radio"/> No |
|-------------------------------------------------------|---------------------------------------------------------------------------------------------------------------------------------------------------------------------------------------------------------------------------------|------------------------------------------------------------------------------------------------------------------------------------------------------------------------------------------------------------------------------------------------------|-------------------------------------------------------|-------------------------|------------------------|----------------|-------------------------------------------------------|

**11. Ankle?**

|                                                       |                                                                                                                                                                                                                                 |                                                                                                                                                                                                                                                      |                                                       |                         |                        |                |                                                       |
|-------------------------------------------------------|---------------------------------------------------------------------------------------------------------------------------------------------------------------------------------------------------------------------------------|------------------------------------------------------------------------------------------------------------------------------------------------------------------------------------------------------------------------------------------------------|-------------------------------------------------------|-------------------------|------------------------|----------------|-------------------------------------------------------|
| <input type="radio"/> Yes<br><input type="radio"/> No | <input type="radio"/> Muscle strain<br><input type="radio"/> Joint sprain<br><input type="radio"/> Tendonitis<br><input type="radio"/> Fracture<br><input type="radio"/> Bruise<br><input type="radio"/> Other: Please tell us: | <input type="radio"/> Overuse from playing or practicing too much or too often<br><input type="radio"/> Direct contact with another player or object<br><input type="radio"/> Non-contact injury not caused by contact with another player or object | <input type="radio"/> Yes<br><input type="radio"/> No | _____<br>Number of days | _____<br>Name of Sport | _____<br>Month | <input type="radio"/> Yes<br><input type="radio"/> No |
|-------------------------------------------------------|---------------------------------------------------------------------------------------------------------------------------------------------------------------------------------------------------------------------------------|------------------------------------------------------------------------------------------------------------------------------------------------------------------------------------------------------------------------------------------------------|-------------------------------------------------------|-------------------------|------------------------|----------------|-------------------------------------------------------|

**12. Foot?**

|                                                       |                                                                                                                                                                                                                                 |                                                                                                                                                                                                                                                      |                                                       |                         |                        |                |                                                       |
|-------------------------------------------------------|---------------------------------------------------------------------------------------------------------------------------------------------------------------------------------------------------------------------------------|------------------------------------------------------------------------------------------------------------------------------------------------------------------------------------------------------------------------------------------------------|-------------------------------------------------------|-------------------------|------------------------|----------------|-------------------------------------------------------|
| <input type="radio"/> Yes<br><input type="radio"/> No | <input type="radio"/> Muscle strain<br><input type="radio"/> Joint sprain<br><input type="radio"/> Tendonitis<br><input type="radio"/> Fracture<br><input type="radio"/> Bruise<br><input type="radio"/> Other: Please tell us: | <input type="radio"/> Overuse from playing or practicing too much or too often<br><input type="radio"/> Direct contact with another player or object<br><input type="radio"/> Non-contact injury not caused by contact with another player or object | <input type="radio"/> Yes<br><input type="radio"/> No | _____<br>Number of days | _____<br>Name of Sport | _____<br>Month | <input type="radio"/> Yes<br><input type="radio"/> No |
|-------------------------------------------------------|---------------------------------------------------------------------------------------------------------------------------------------------------------------------------------------------------------------------------------|------------------------------------------------------------------------------------------------------------------------------------------------------------------------------------------------------------------------------------------------------|-------------------------------------------------------|-------------------------|------------------------|----------------|-------------------------------------------------------|
